# Supplementary material for: Facile synthesis of Pd@Ru nanoplates with controlled thickness as efficient catalysts for hydrogen evolution reaction
Source: Royal Society of Chemistry journal article supplement (doi:10.1039/c8ce00549d), 2018-01-01
Supplement: c8ce00549d1.pdf [file c8ce00549d1.pdf]

## Supporting Information

### **Facile synthesis of Pd@Ru nanoplates with controlled thickness as efficient catalysts for hydrogen evolution reaction**

Yu Han,<sup>a</sup> Yucong Yan,<sup>a</sup> Zhemin Wu,<sup>a</sup> Yi Jiang,<sup>a</sup> Xiao Li,<sup>a</sup> Qingfeng Xu,<sup>a</sup> Xiaofang Yang,<sup>b,\*</sup>  
Hui Zhang,<sup>a,\*</sup> Deren Yang<sup>a</sup>

<sup>a</sup>State Key Laboratory of Silicon Materials & School of Materials Science and Engineering,  
Zhejiang University, Hangzhou, Zhejiang 310027, P. R. China.

<sup>b</sup>College of Materials Science and Engineering, Chongqing University, Chongqing 400044,  
P. R. China.

\*Correspondence to: yangxf@cqu.edu.cn, msezhanghui@zju.edu.cn

**Table S1.** ICP-AES data of the Pd@Ru bimetallic nanoplates with different thickness and the molar ratio of the Pd and Ru precursors fed in the synthesis.

| <b>Ru : Pd</b>     | <b>molar ratio of the Ru and<br/>Pd precursors</b> | <b>atomic ratio of Ru/Pd</b> |
|--------------------|----------------------------------------------------|------------------------------|
| Pd@Ru <b>(1.6)</b> | 26.4 : 73.6                                        | 25.1 : 74.9                  |
| Pd@Ru <b>(1.9)</b> | 41.7 : 58.3                                        | 35.7 : 64.3                  |
| Pd@Ru <b>(2.3)</b> | 51.8 : 48.2                                        | 49.4 : 50.6                  |
| Pd@Ru <b>(2.6)</b> | 58.9 : 41.1                                        | 59 : 41                      |

**Table S2.** Tafel slopes of the Pd@Ru nanoplate electrocatalysts with different thickness.

| <b>catalyst</b>    | Pd@Ru<br>(1.6) | Pd@Ru<br>(1.9) | Pd@Ru<br>(2.3) | Pd@Ru<br>(2.6) | Ru/C | Pt/C | Pd/C |
|--------------------|----------------|----------------|----------------|----------------|------|------|------|
| <b>Tafel slope</b> | 77             | 46             | 36             | 83             | 85   | 37   | 131  |

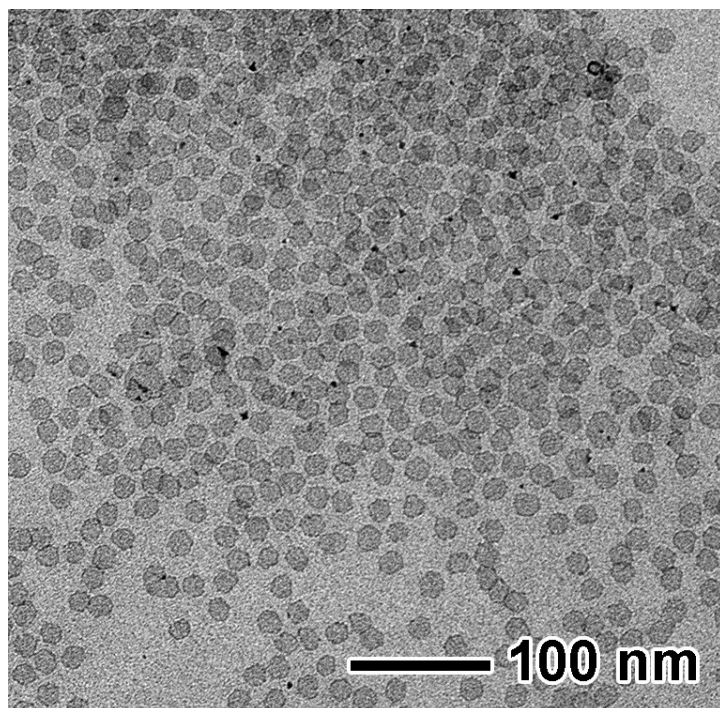

**Figure S1.** TEM image of Pd nanoplates with an average edge length of 6 nm.

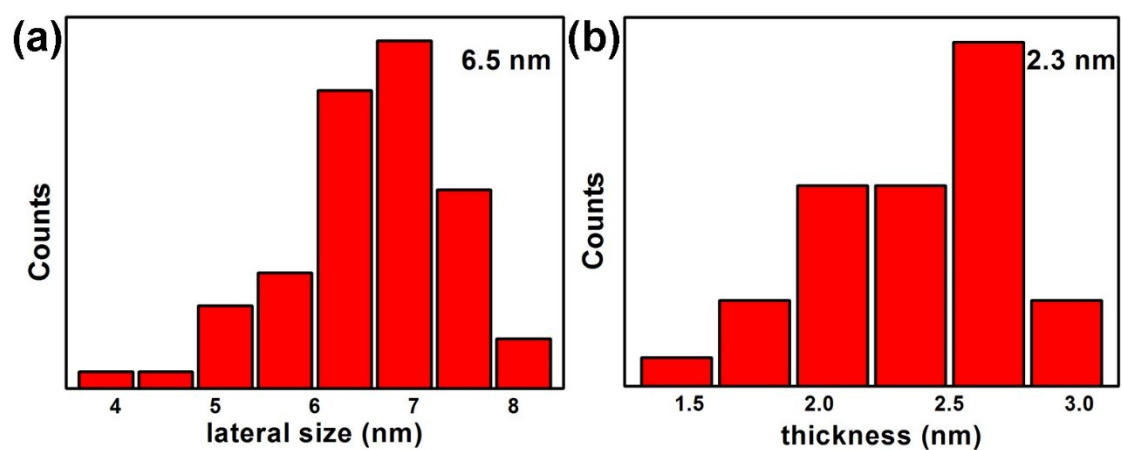

**Figure S2.** (a) The lateral size and (b) thickness distribution of the Pd@Ru nanoplates prepared using the standard procedure.

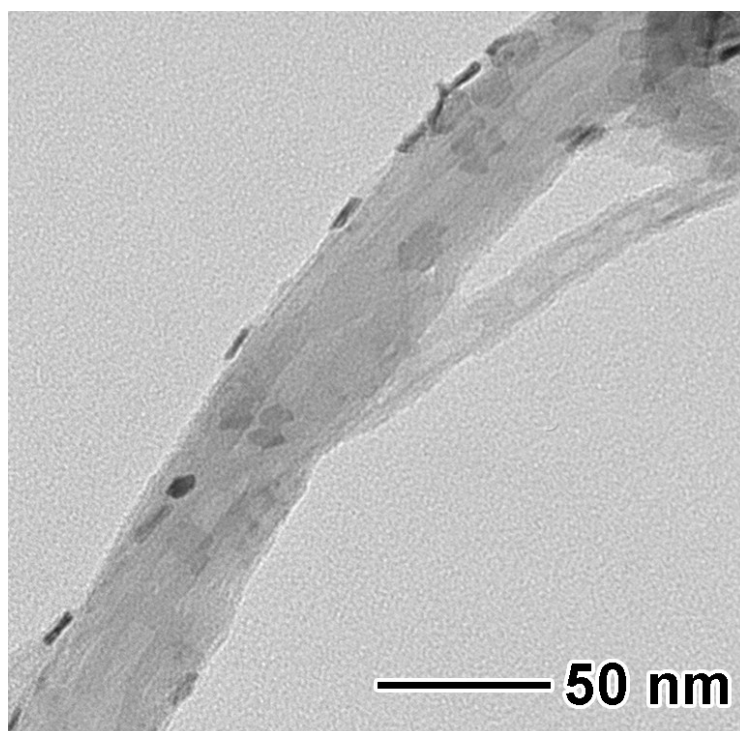

**Figure S3.** TEM images of the Pd@Ru nanoplates prepared using the standard procedure that mixed with the carbon nanotubes

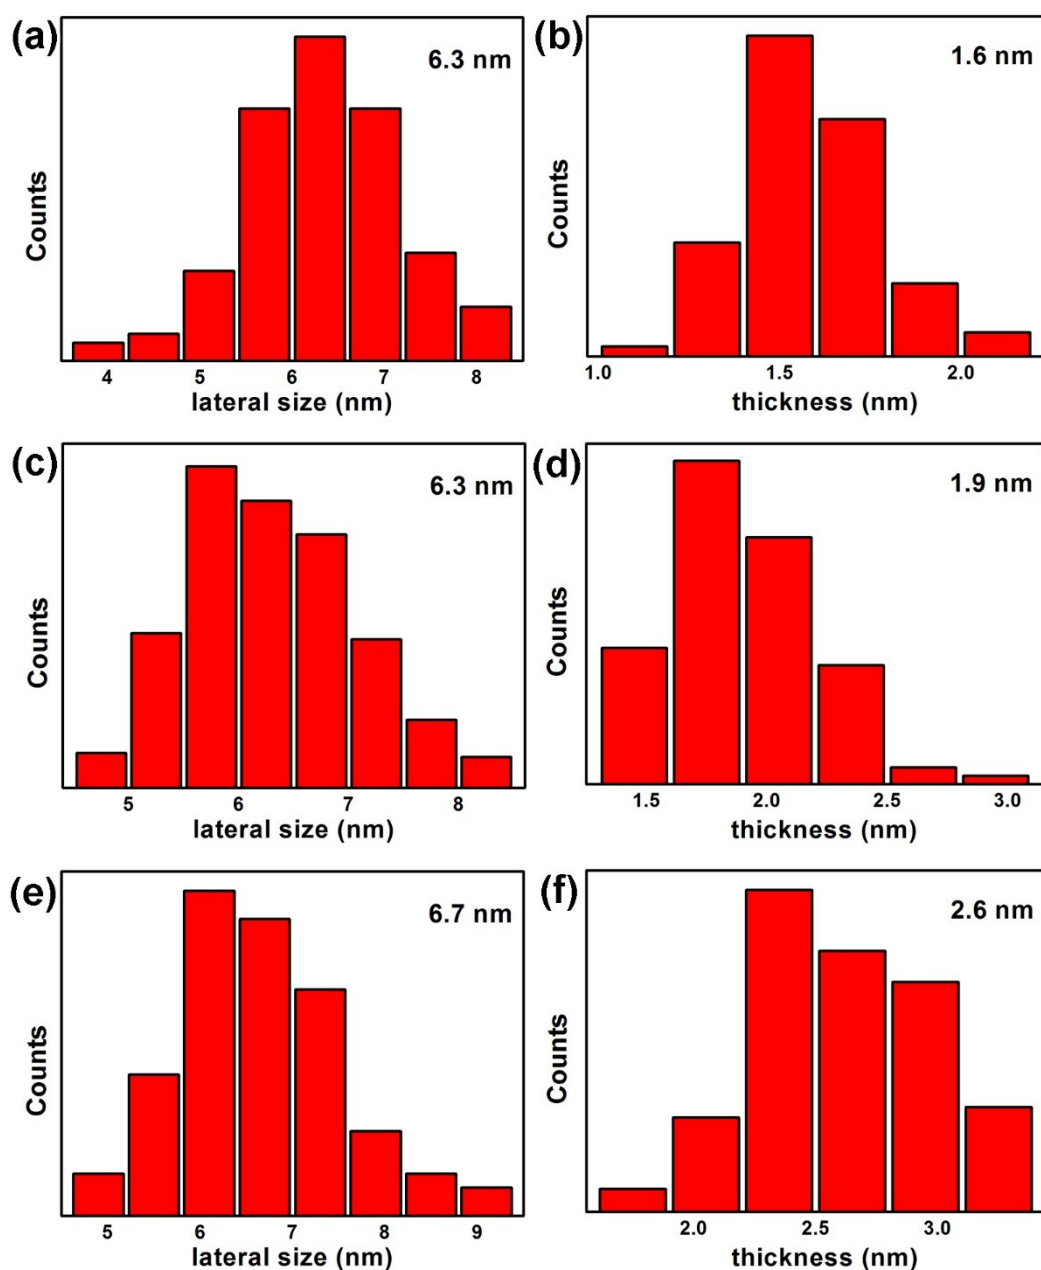

**Figure S4.** (a, c, e) The lateral size and (b, d, f) thickness distribution of the Pd@Ru nanoplates prepared using the standard procedure except with different amount of Ru precursor including 7.53, 15.06 and 30.12  $\mu\text{mol}$ , respectively.

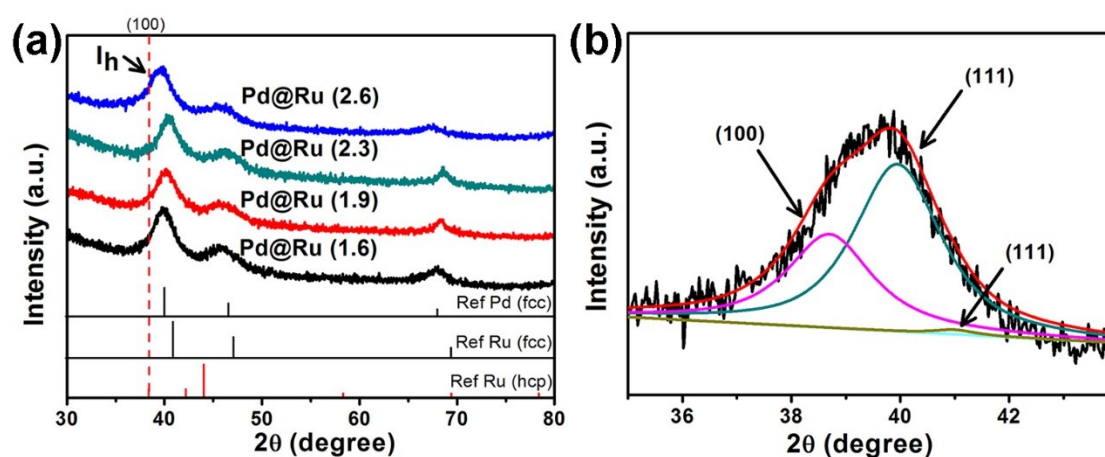

**Figure S5.** (a) XRD patterns of Pd@Ru nanoplates with different thickness: Pd@Ru (1.6), Pd@Ru (1.9), Pd@Ru (2.3) and Pd@Ru (2.6). (b) Enlargement of the XRD pattern of Pd@Ru (2.6) from 38° to 41°. Black bars in (a): JCPDS no. 65-6174 (*fcc* Pd) and JCPDS no. 88-2333 (*fcc* Ru), respectively. Red bars in (a): JCPDS no. 06-0663 (*hcp* Ru).

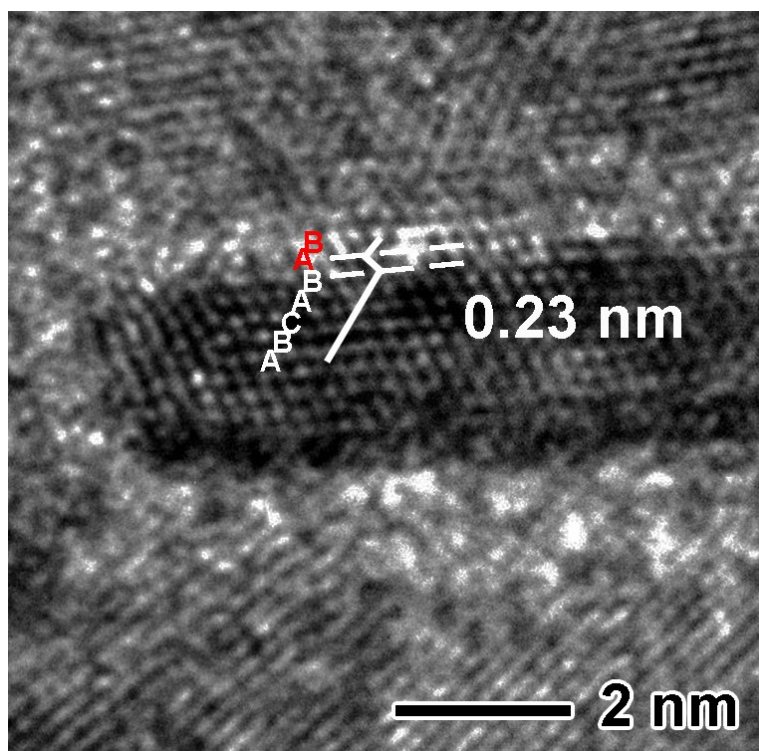

**Figure S6.** HRTEM image of an upright Pd@Ru (2.6) nanoplate.

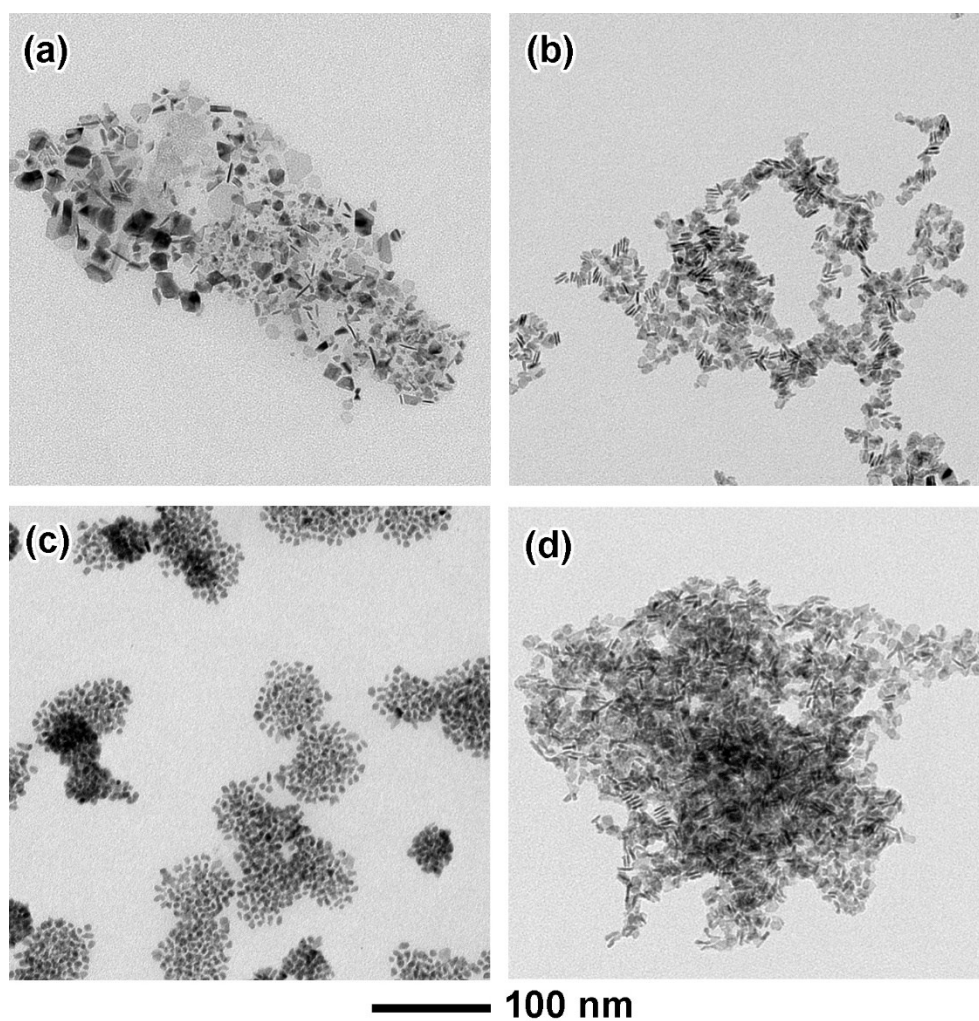

**Figure S7.** TEM images of the nanocrystals prepared using the standard procedure except (a) at a reaction temperature of 100 °C, (b) at a reaction temperature of 150 °C, (c) in the absence of Pd seeds, (d) without the introduction of any PVP.

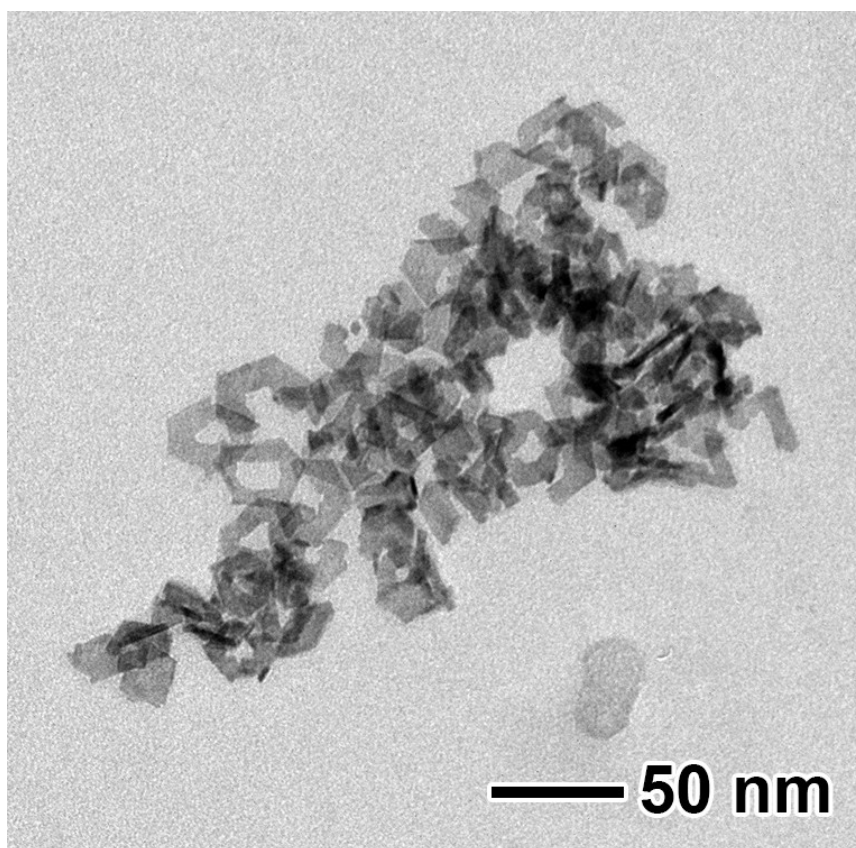

**Figure S8.** TEM image of the nanocrystals prepared using the standard procedure except in air condition.

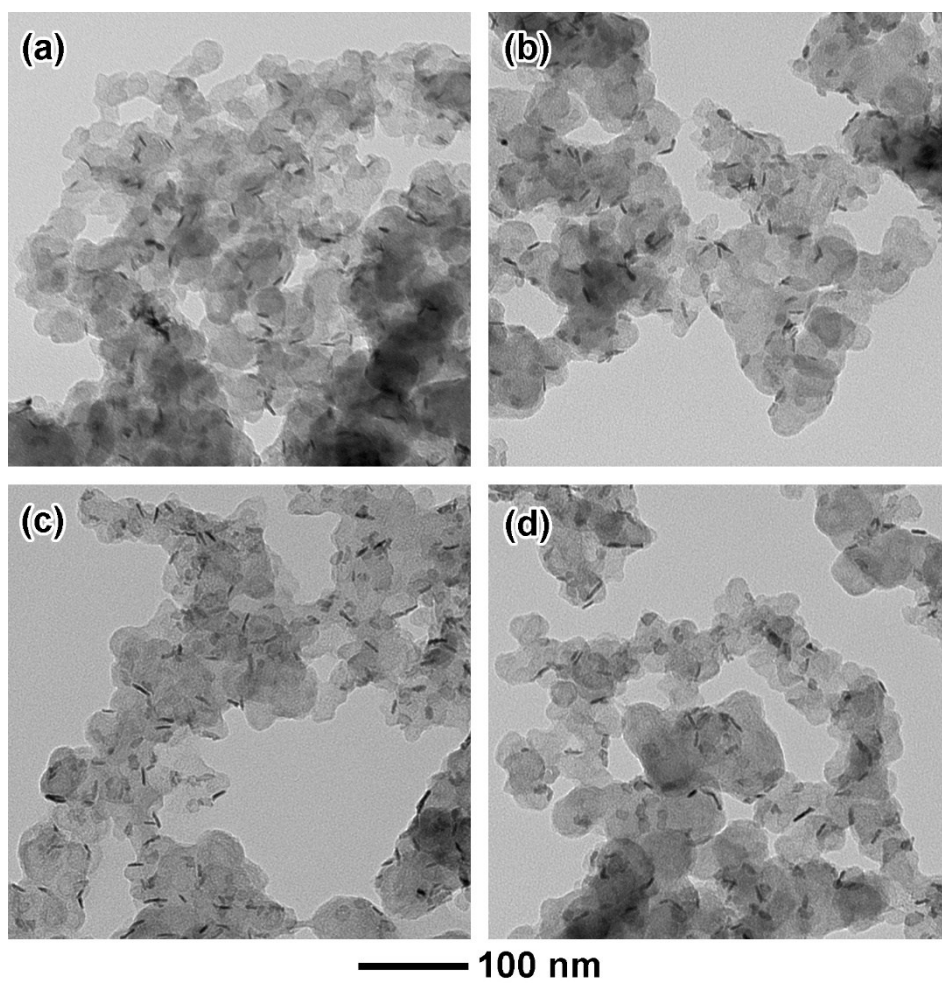

**Figure S9.** TEM images of (a) Pd@Ru (1.6), (b) Pd@Ru (1.9), (c) Pd@Ru (2.3) and (d) Pd@Ru (2.6) catalysts (20 wt% loaded on carbon).

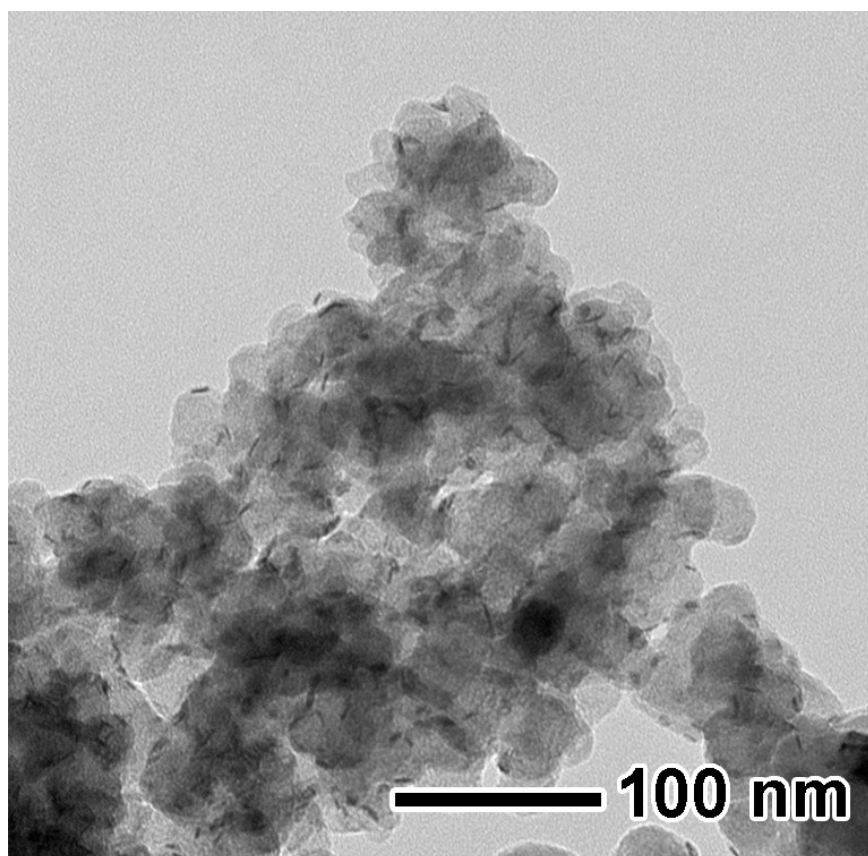

**Figure S10.** TEM image of Pd nanoplate (the same size as the Pd seeds) catalysts (20 wt% loaded on carbon).

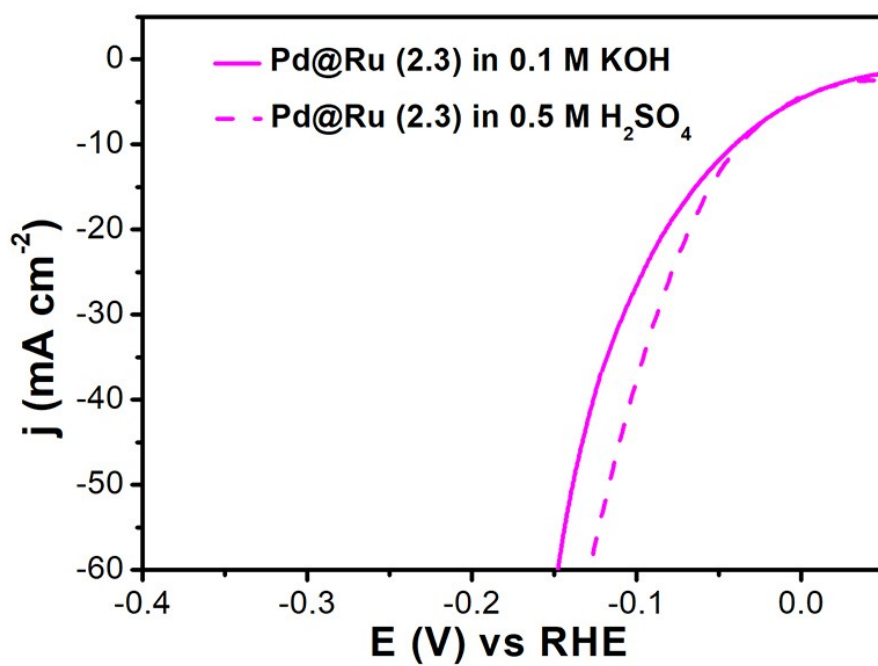

**Figure S11.** HER polarization curves of Pd@Ru (2.3) in 0.1 M KOH solutions and 0.5 M H<sub>2</sub>SO<sub>4</sub> solutions.

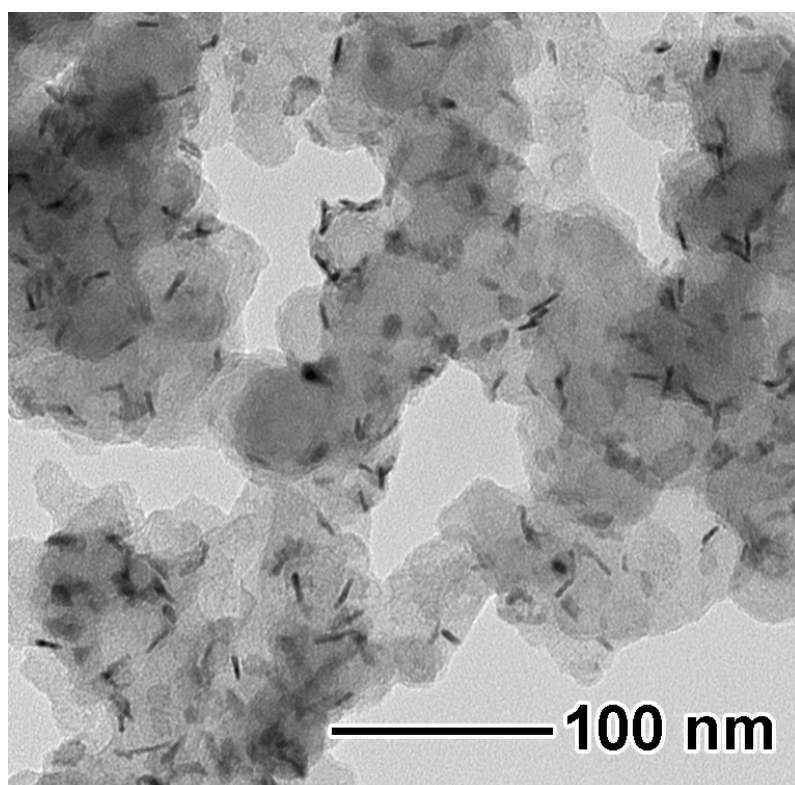

**Figure S12.** TEM image of Pd@Ru (2.3) catalysts after the chronoamperometric measurement.

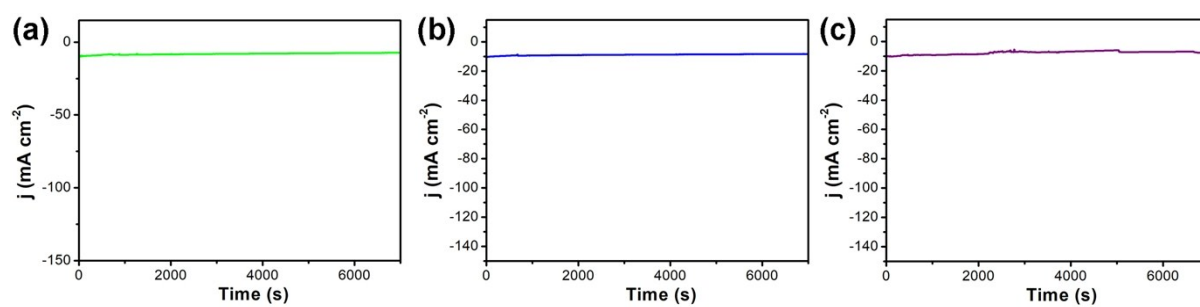

**Figure S13.** Current-time ( $I$ - $t$ ) chronoamperometric curves of (a) Pd@Ru (1.6), (b) Pd@Ru (1.9) and Pd@Ru (2.6) catalysts.
